# Supplementary material for: Global DNA Methylation Changes in Nile Tilapia Gonads during High Temperature-Induced Masculinization
Source: PubMed Central journal article supplement (PMC4972363; doi:10.1371/journal.pone.0158483), 2016-08-03

**A**

● CF CpG<sub>o/e</sub> ratio  
● CM  L  H

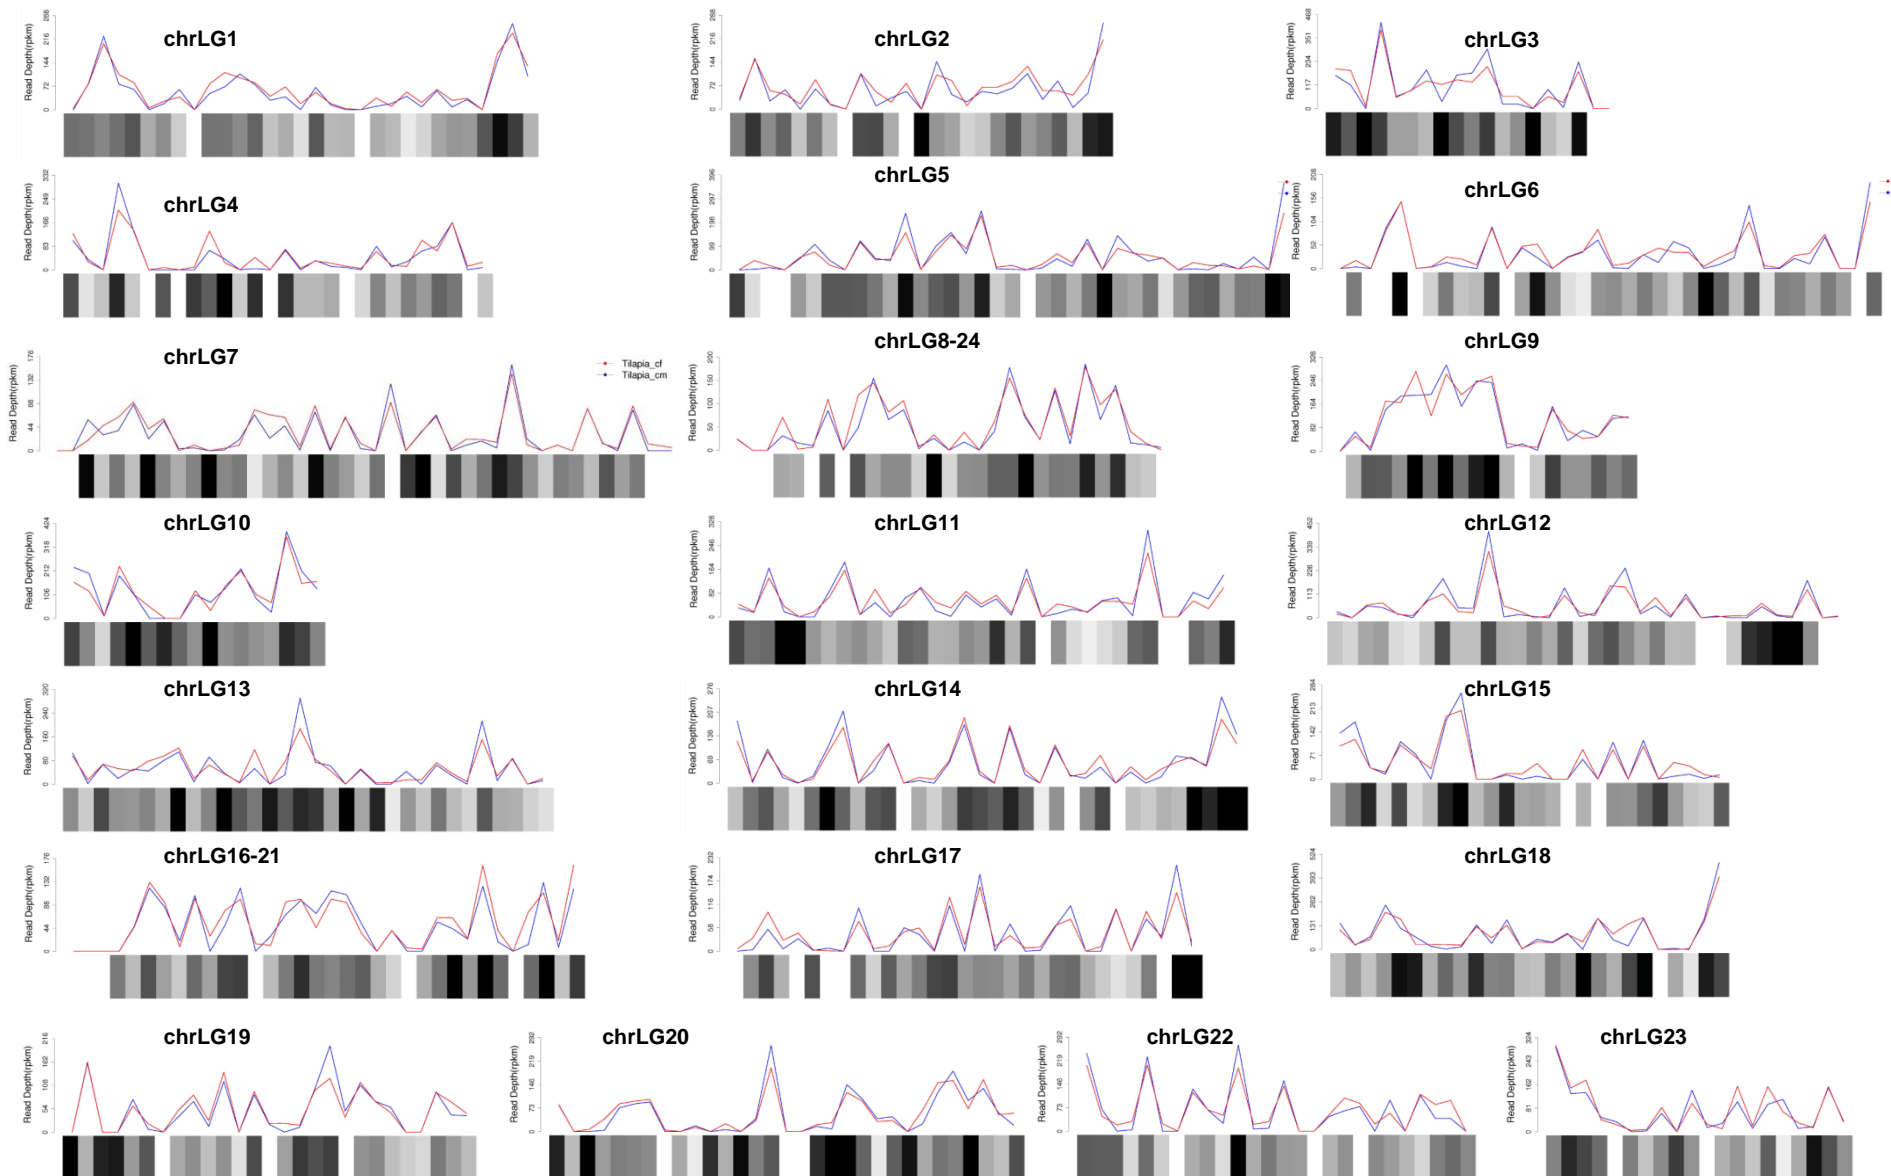

**B**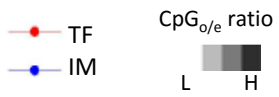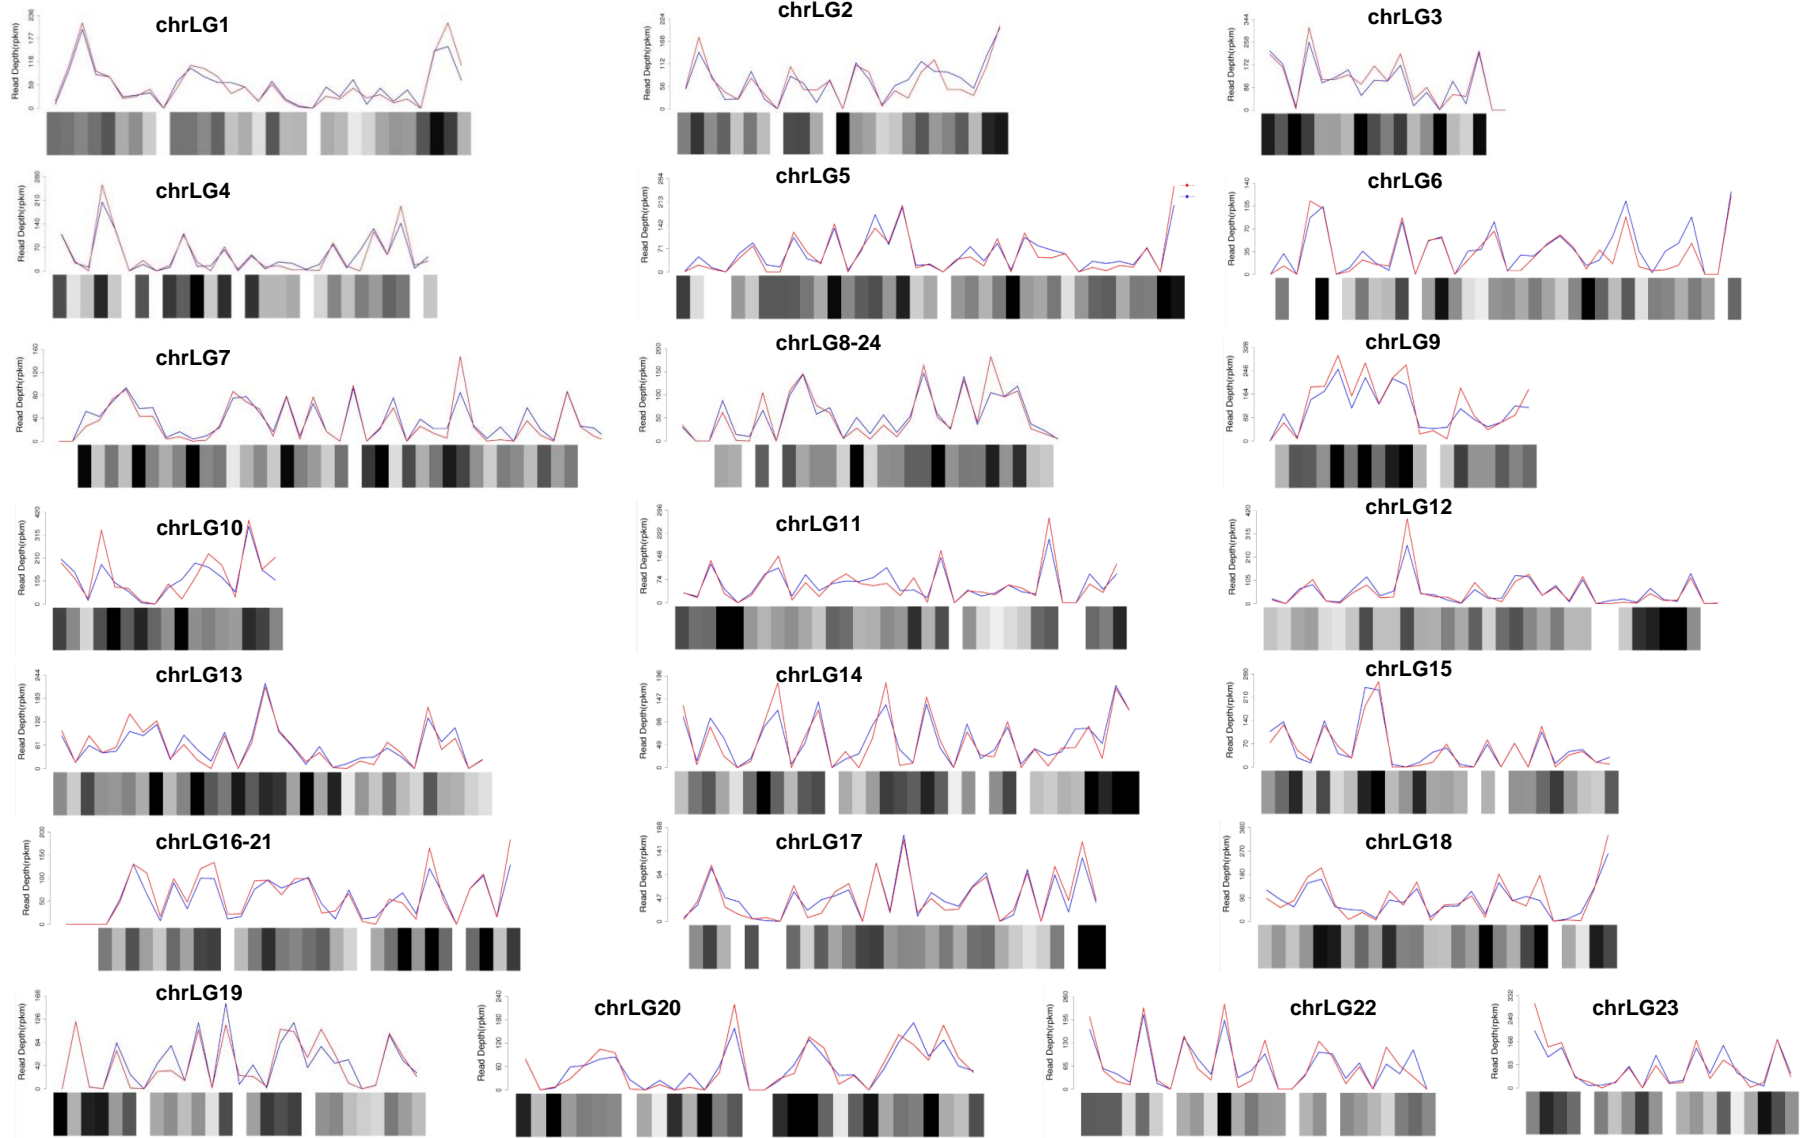



**D**

● IM  
● CM

CpG<sub>0/e</sub> ratio

L H

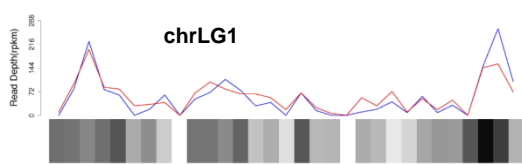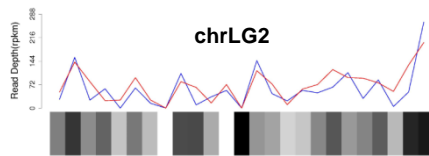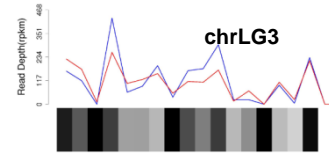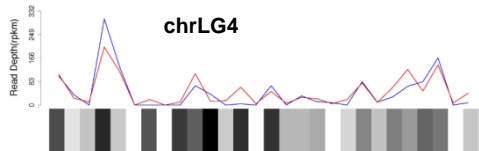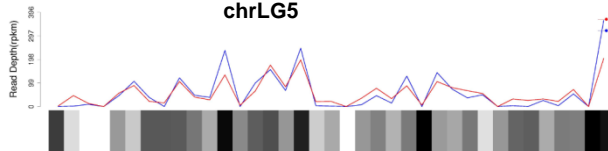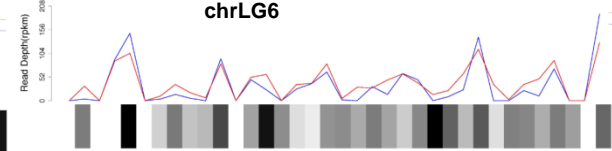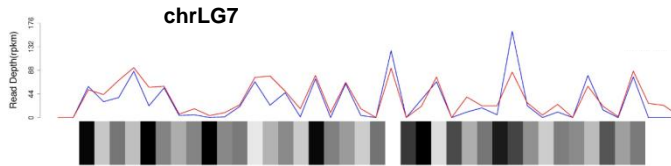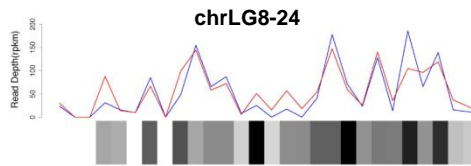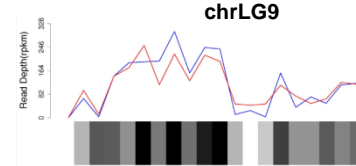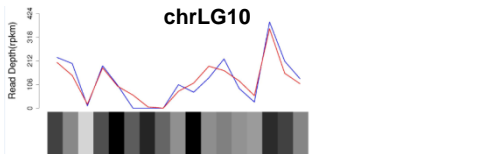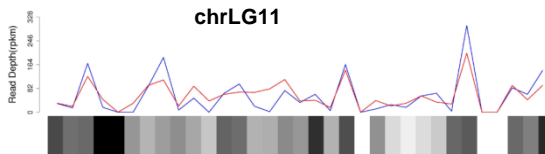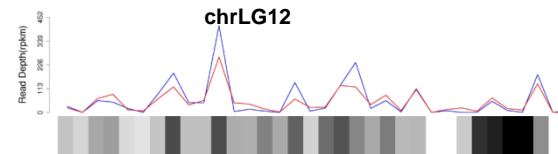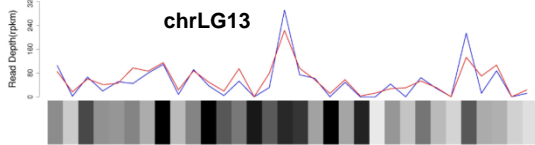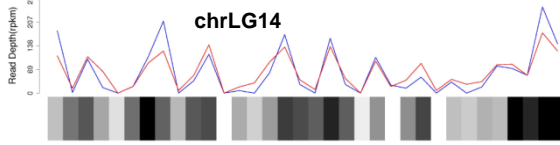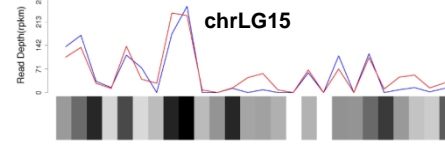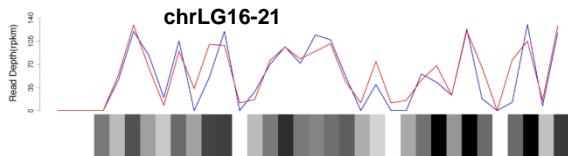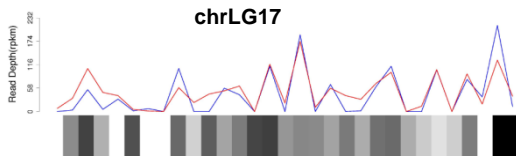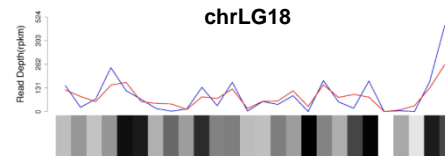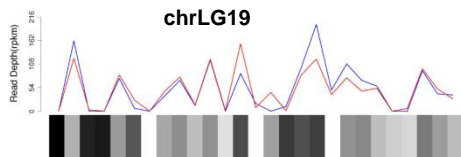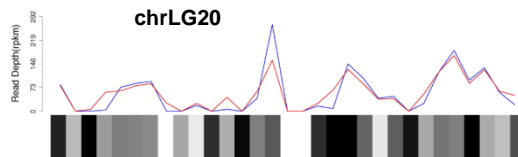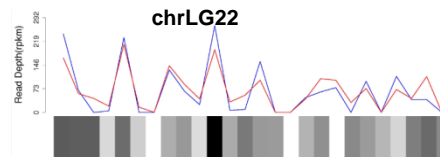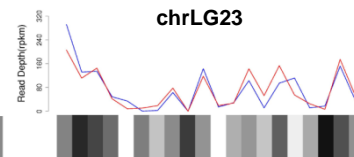

Supplement: pone.0158483.s003.pdf [file pone.0158483.s003.pdf]
