# Supplementary material for: Global DNA Methylation Changes in Nile Tilapia Gonads during High Temperature-Induced Masculinization
Source: PubMed Central journal article supplement (PMC4972363; doi:10.1371/journal.pone.0158483), 2016-08-03

**A**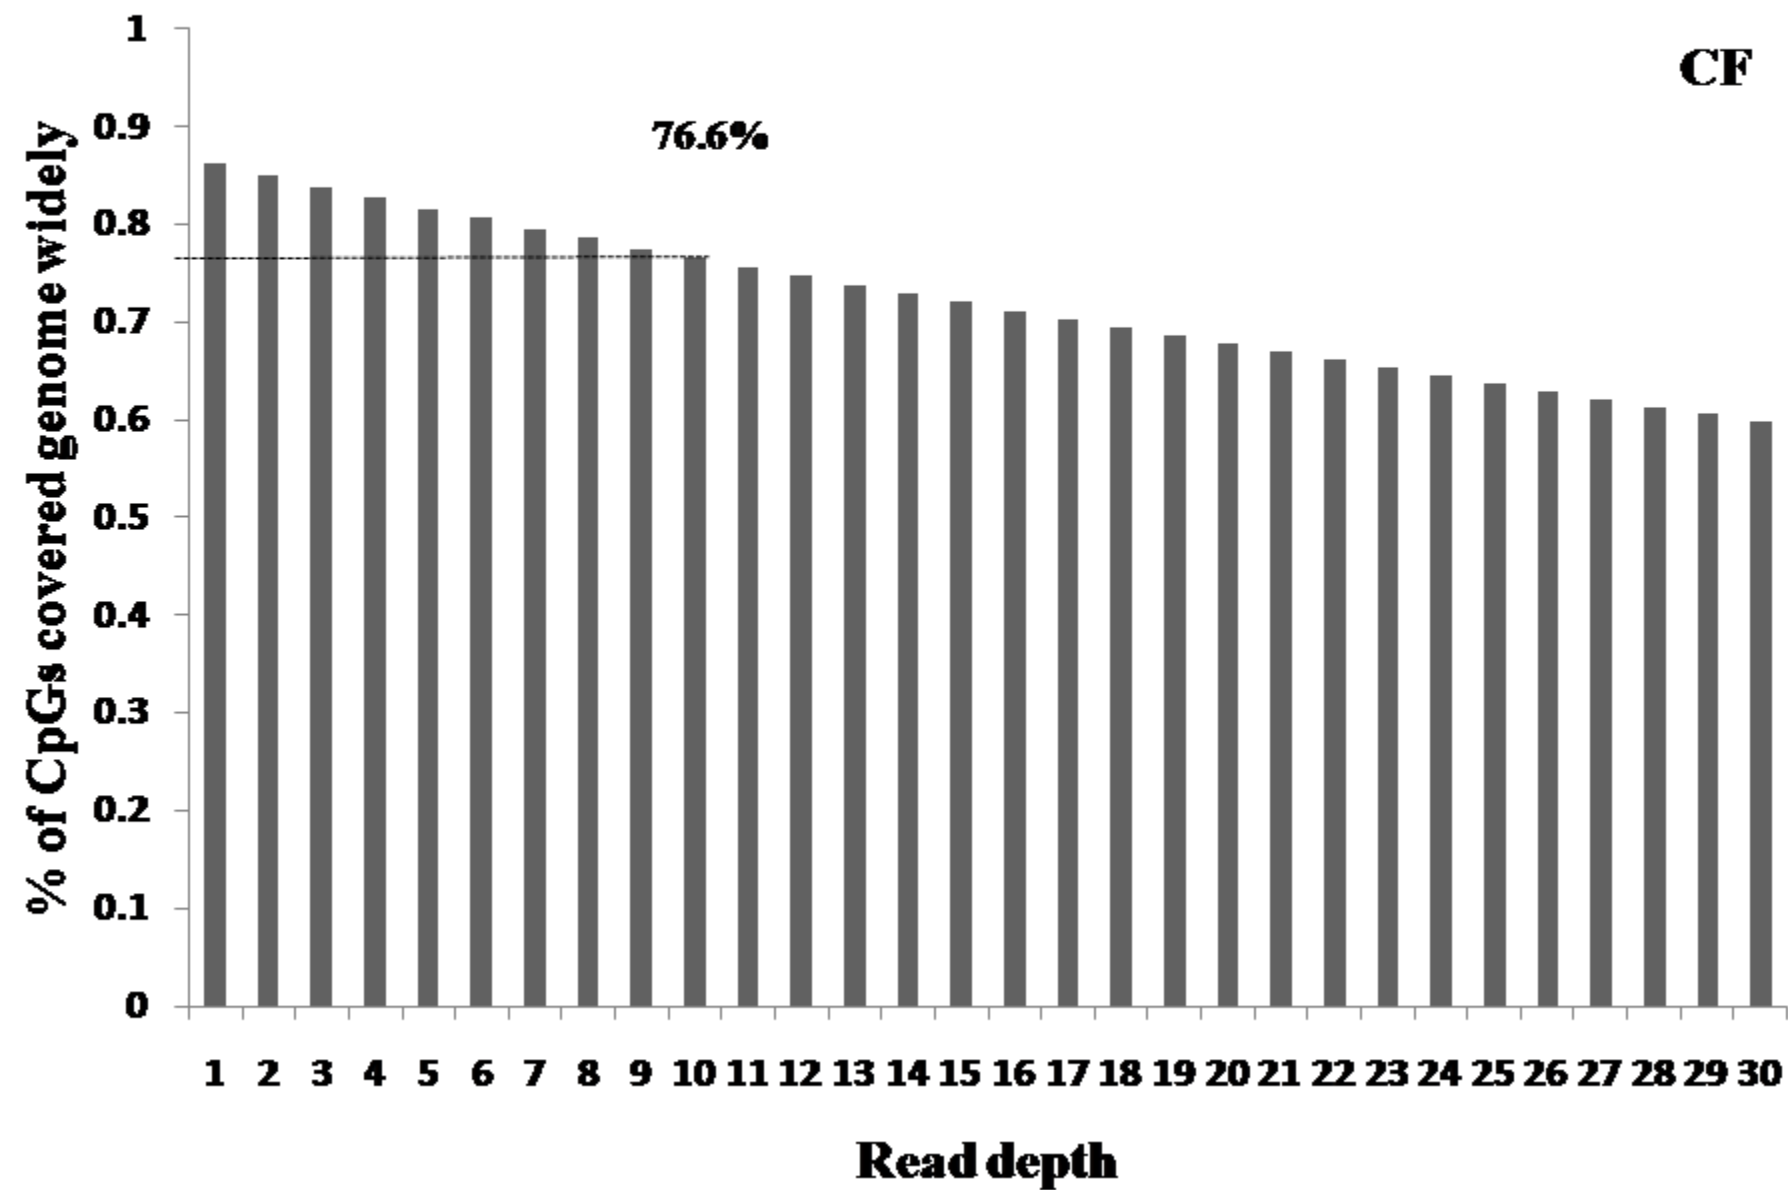

**B**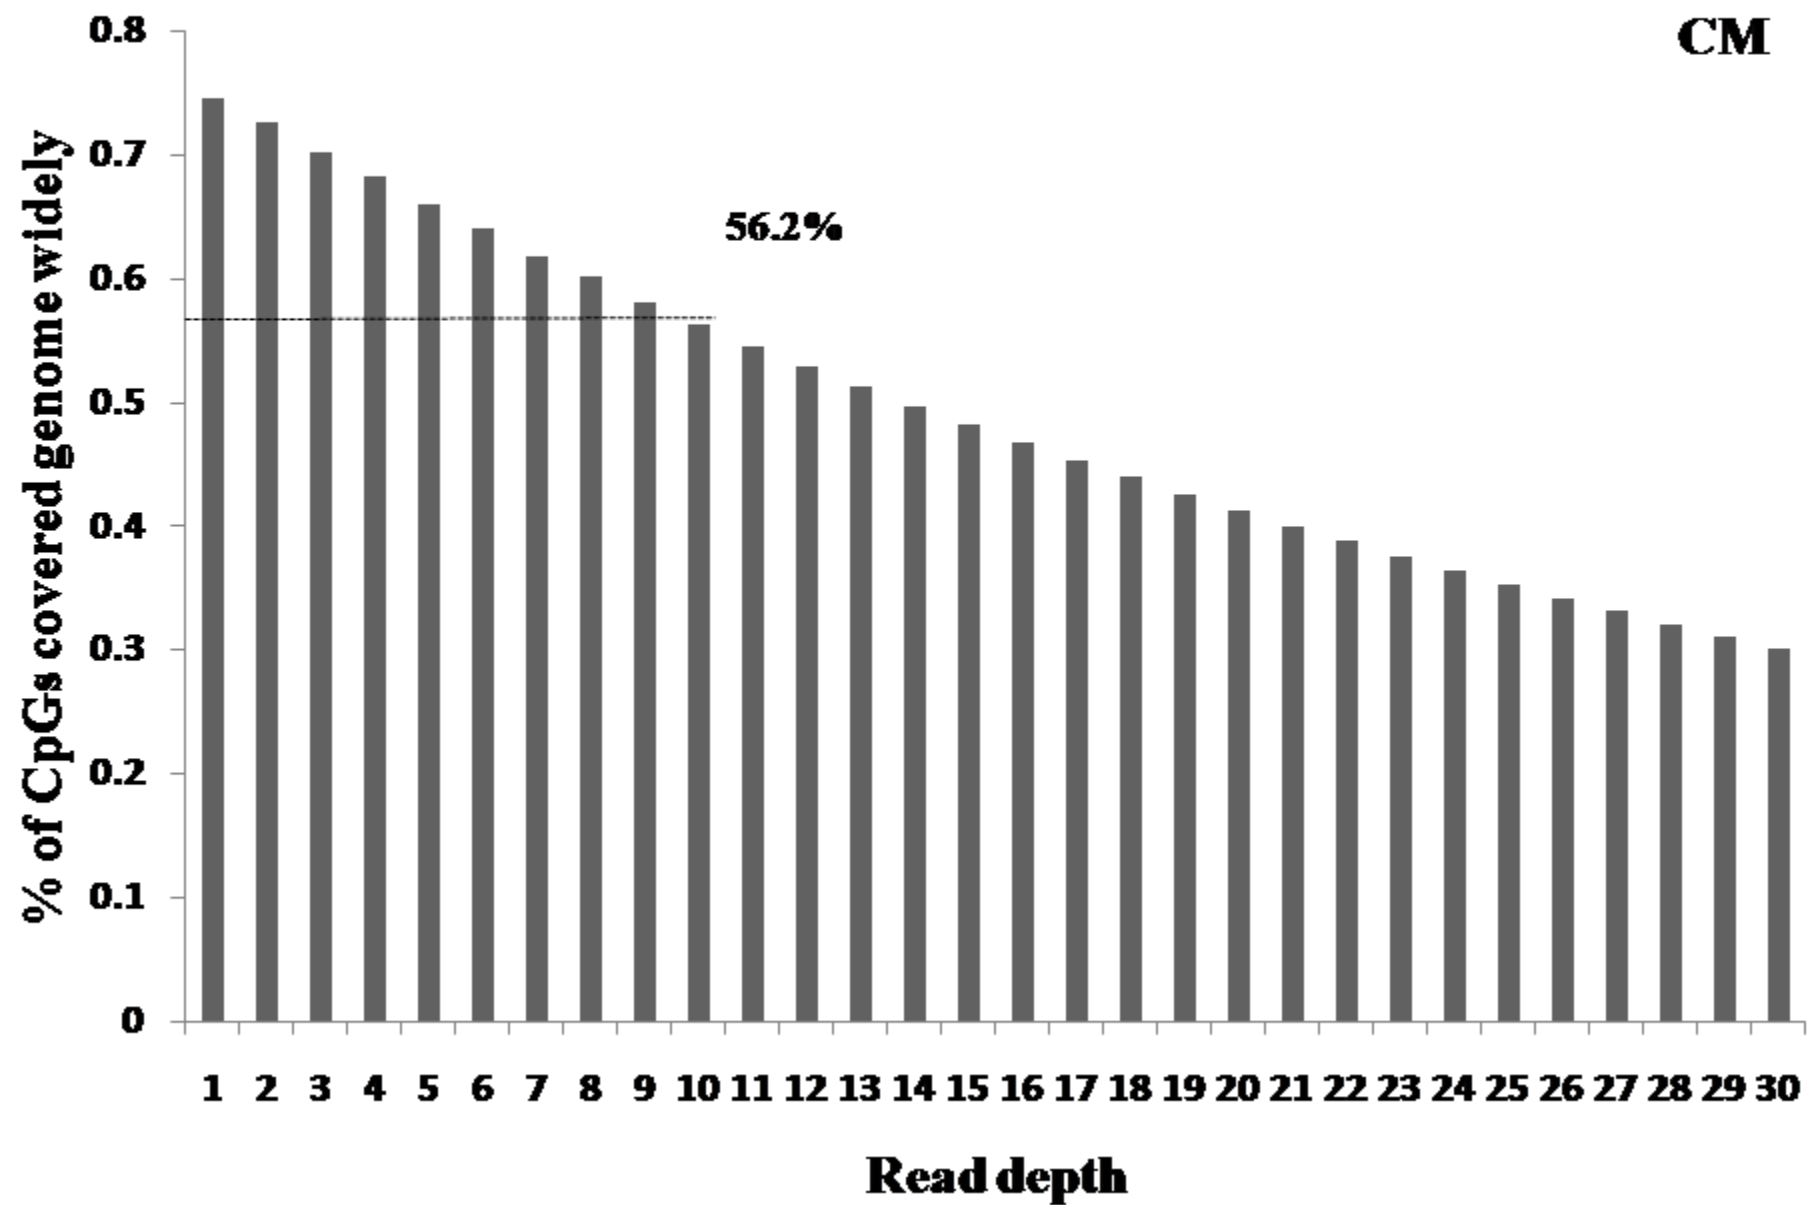

**C**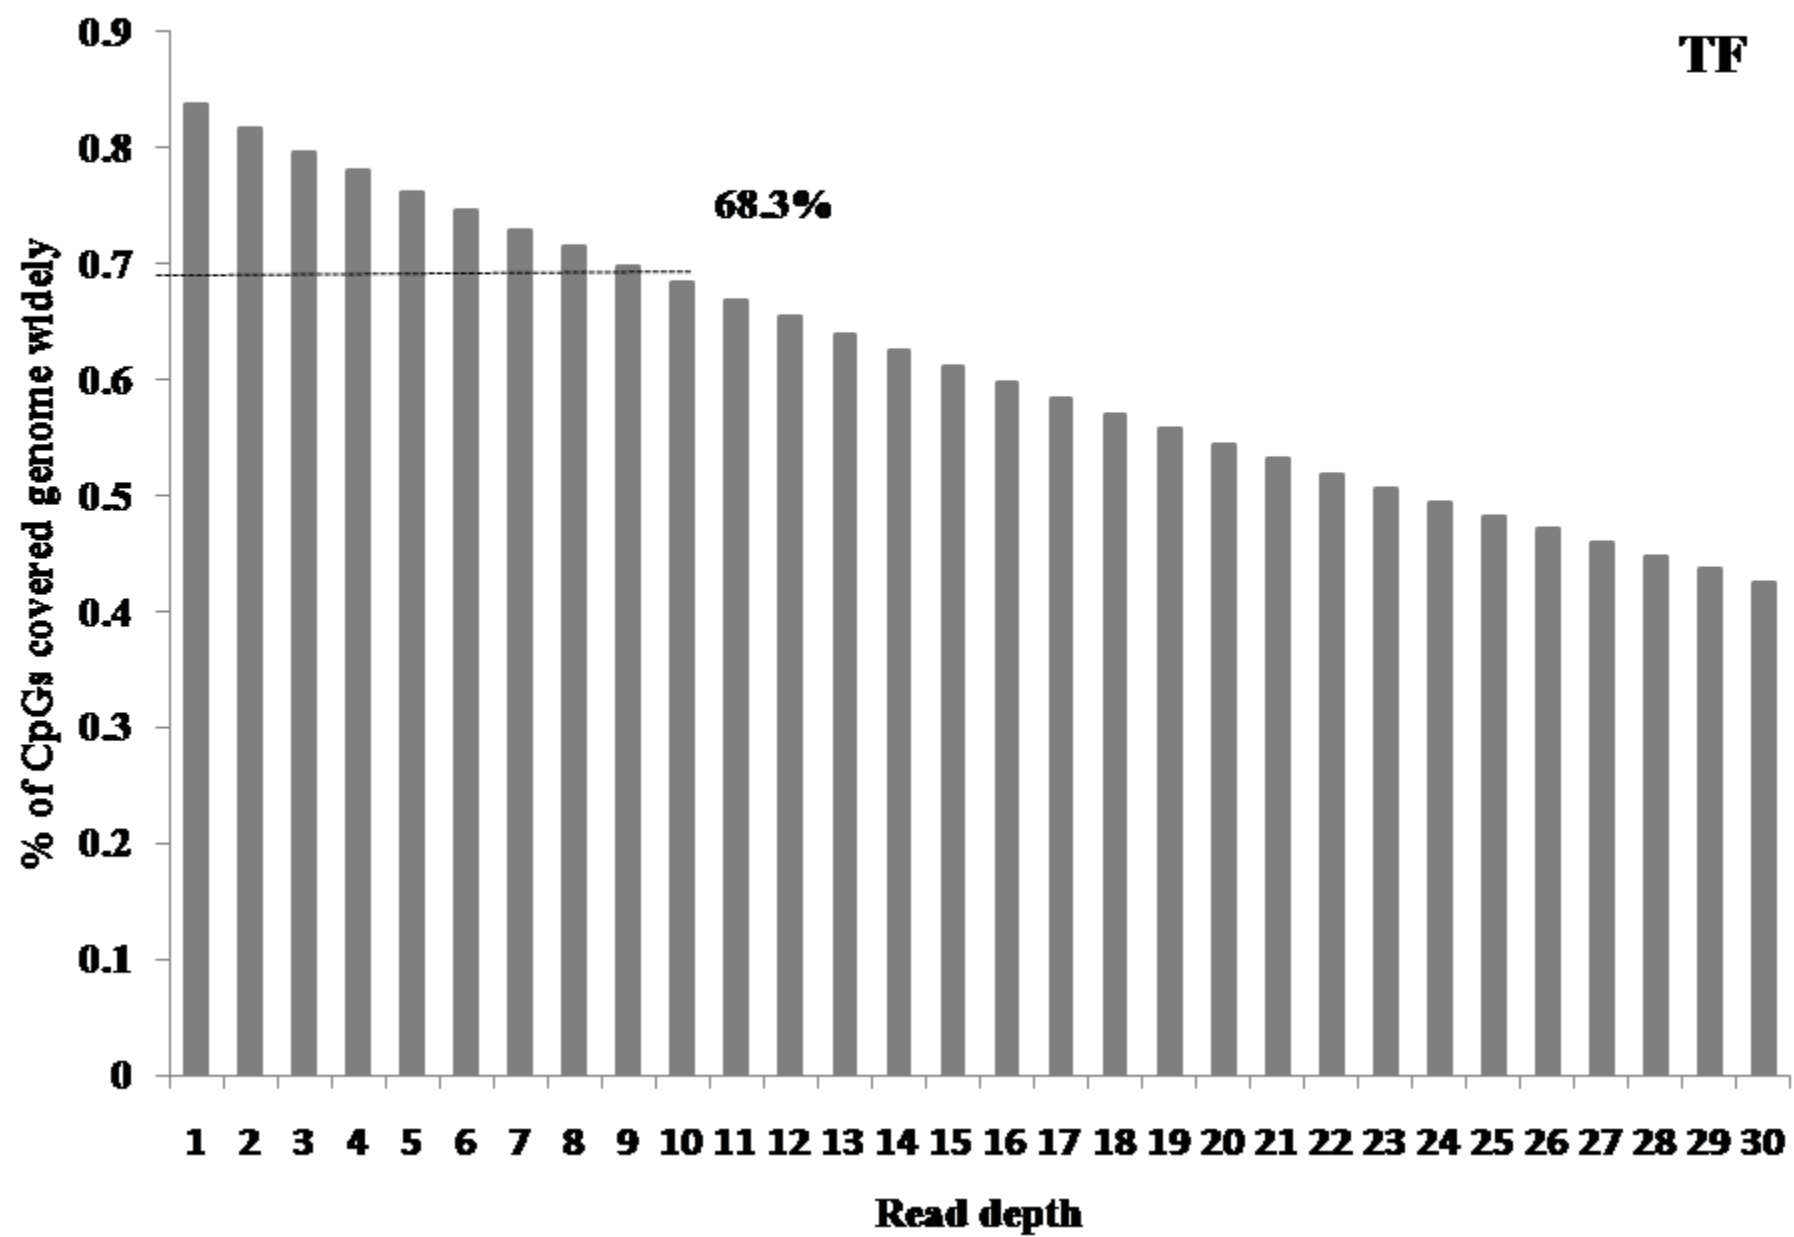

**D**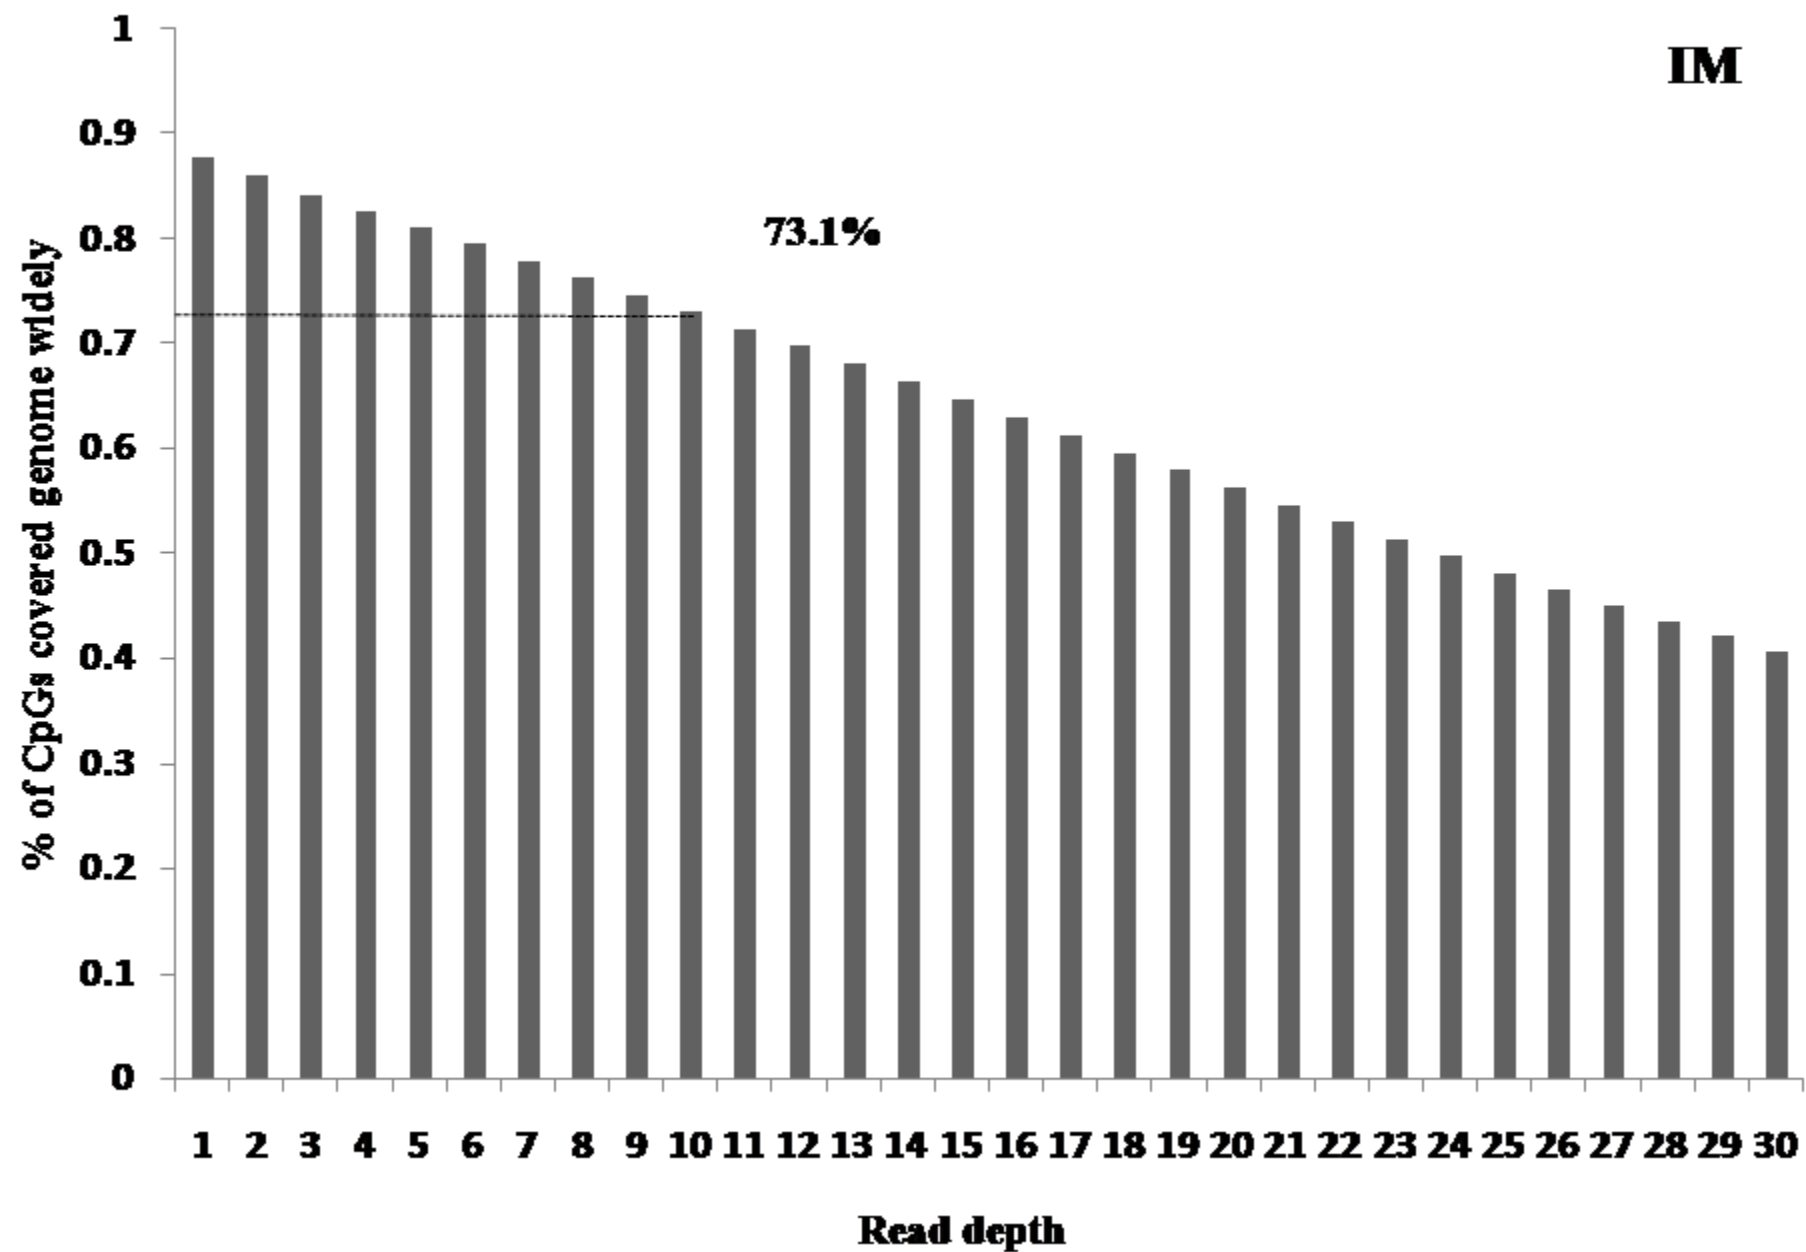

Supplement: pone.0158483.s002.pdf [file pone.0158483.s002.pdf]
